# Supplementary material for: Loss of YABBY2-Like Gene Expression May Underlie the Evolution of the Laminar Style in Canna and Contribute to Floral Morphological Diversity in the Zingiberales
Source: PubMed Central journal article supplement (PMC4679924; doi:10.3389/fpls.2015.01106), 2015-12-16
Supplement: Image1.pdf [file Image1.pdf]

133 300

*Amborella\_trichopoda*\_AB126654

GAGCACGTCTGCTATGTTTCAGTGCAACCTATGCAACACCATTTTAGCGGTTAGTGTTCCAGGAAGCTGCTTG---  
---TTCGGTATTGTAACAGTAAGATGCGGGCATTGCACCAATCTGCTCTCTATGAATAATCGACCACCAGAG---  
AAGAGGCAACGCGTTCATCAGCTTACAACCGCTTTATAAAAGAGGAAATCCAAAGGATCAAGGCTAGGAATCCC  
GAGATAACCCATAGGGAGGCCTTCAGCACTGCAGCAAAGAATTGGGCTCACTTCCCTCATCTTCATTATGGATTG

*Amborella\_trichopoda*\_AB168113

GAGCAGTTGTGCTATGTCCACTGCAACTTTTTCGACACTGTCCTCGCAGTGAGCGTTCATGCAGCAGCCTA---  
---TTCAAGATGGTTACAGTGAGATGCGGTCATTGCACCAATGTTCTCTCCGTCGATAGCCGTCCTCCGGAG---  
AAGAGACAAAGAGTTCCTCGGCGTACAACCGCTTTATCAAGGAAGAGATCCAACGAATCAAAGCGGGAAACCCG  
GACATCACCCACAGGGAAGCGTTCAGCACTGCGGCCAAGAAGCTGGGCTCACTTTCCACACATCCATTTCCGGTCTT

*Amborella\_trichopoda*\_AJ877257

GACCATCTTTGCTACGTTTCGCTGCAACTTCTGCGACACCCTTCTCGCTGTTGGTGTTCCATGCAGAAGGTTA---  
---ATGGACACAGTGACAGTGAAGTGTGGGCATTGCAGCCAT---CTCTCATTCTCGTAAAGCCTCCTGAG---  
AAGAAACACAGGCTCCCTTCAGCTTACAATCGGTTTCATGAAGGAGGAGATAAAGAGAATCAAAGCTGGAAACCCG  
GAAATACCACATAGAGAAGCGTTCAGCATGGCTGCAAAGAATTGGGCCAGGTTTCGATCCTCAACTGCTGCATGGC

*Antirrhinum\_majus*\_AY451398

GAATGTGTTTGTACGTTCACTGCAACTTCTGCAACACCATTCTAGCGGTGAGTGTTCCCTGCAGCAATATG---  
---TTTACGATTGTGACTGTGAGATGTGGGCATTGTGCAAATCTGCTGTCTGTTAATATTCGTCCTCCAGAG---  
AAAAGACAACGTGTCCCATCAGCATATAACCGATTATAAAGGAGGAGATTAGAGGATAAAGGCTGGCAATCCA  
GAAATTAGTCACAGGGAAGCTTTTAGCACAGCTGCAAAAAATTGGGCACATTTCCCTCATATTCTTTTGGACTA

*Antirrhinum\_majus*\_AJ559642

GAGCATCTTTGCTATGTCCGTTGCAACTTCTGCAGCACTGTTCTTTCGCGGTTGGGATTCCATGCAAGAGGCTG---  
---ATGGACACAGTGACTGTGAAATGTGGGCACTGCAGCAAT---CTCTCATTCTCGTAAACCTCCTGAG---  
AAGAAGCACAGGCTTCATCAGCCTACAATCGGTTTCATGAAAGAGGAGATACAGCGTATCAAAGCAGCCAATCCG  
GAGATACCACATCGAGAGGCTTTTCAGTGCAGCTGCAAAAAATTGGGCTAGGTACATTCCAAACACTCCACCACCA

*Antirrhinum\_majus*\_AY451396

GAGCAGCTCTGTTACGTCCATTGCAACTTTTGTGACACTGTCCTCGCGGTGAGTGTTCCCTGCACTAGCTTG---  
---ATCAAGACTGTGACTGTGAGATGTGGGCATTGCACCAACCTTCTGTCCGTGAACAACAGACCCCCGGAG---  
AAAAGACAGAGAGTGCCATCAGCTTACAACCGCTTATAAAGGACGAGATCCAACGTATCAAAGCTGGAAACCT  
GATATAAGTCACAGGGAGGCCTTCAGTGCCGCACTAAAAATTGGGCCACTTCCACACATTCATTTTGGCCTC

*Antirrhinum\_majus*\_AY451397

GAGCAACTTTGCTACATTTCTGCAACTTCTGCAGTATTGTTCTTTCGCGTAAGTGTTCCATGCAGTAGCTTG---  
---TTTGATGTTGTGACAGTTCGATGTGGGCACTGTACCAATCTATGGAGTGTGAATAATCGACCCCCTGAG---  
AAGAGGCAACGAGTGCCATCTGCATATAACAGTTCATAAAGAAGAGATTCAAAGAATTAAGGCCAATAATCCA  
GAAATAAGCCACAGAGAAGCATTTCAGCACTGCTGCCAAAAATTGGGCACACTTTCCCTCACATTCATTTTGGGCTG

*Arabidopsis\_thaliana*\_AF132606

GAACATCTCTACTACGTCCGGTGTAGCATCTGCAACACCATCCTCGCGGTTGGGATACCATTGAAGAGAATG---  
---CTTGACACGGTAACGGTGAATGCGGCCATTGTGGTAAC---CTCTCGTTTCTCGTCAAACCTCCTGAG---  
AAGAAGCAGAGGCTCCCATCTGCATACAACCGCTTTCATGAGGGATGAGATCCAACGCATCAAAGTGCCAATCCG  
GAAATACCACACCGTGAAGCTTTTCAGTGCTGCTGCCAAAAATTGGGCTAAGTACATACCCAACCTCTCCTACTTCC

*Arabidopsis\_thaliana*\_AF136538

GACCATCTCTGCTATGTCCAATGCAACTTTTTCGCAACACCATCCTTTCGCGGTTAATGTTCCCTTACACAAGCTTG---  
---TTCAAGACCGTAACTGTCCGATGTGGTGTGCTGTACCAATCTCCTTTTCGGTGAACAACCGCCCTCCAGAG---  
AAAAGACAGAGAGTCCCATCCGCATATAACCGATTTCATCAAGGAGGAGATCCAACGTATCAAAGCTGGTAATCCT  
GATATAAGCCACAGAGAAGCCTTTAGTGCTGCTGCCAAGAATTGGGCCACTTCCCCACATACACTTCCGGGCTC

*Arabidopsis\_thaliana\_AF195047*

GGGCAGATTTGCCATGTCCAGTGTGGTTTTTGCACCACTATTTTGTGCTGGTGAGTGTACCGTTTTACAAGCTTG---  
---TCAATGGTGGTGACTGTGAGATGTGGCATTGCACAAGCCTTCTCTGTCAATAATAAACCACCTGAG---  
AAGCGACAAAGAGCTCCTTCAGCTTACAATTGCTTCATCAAGGAAGAGATCAGGAGGTTAAAGGCTCAGAATCCA  
AGCATGGCTCACAAGGAAGCTTTCAGCTTAGCTGCCAAAAATTGGGCCATTTTCTCCAGCTCACAACAAGAGA  
*Arabidopsis\_thaliana\_AF136539*

GAGCGTGTGGCTATGTCCACTGCAGCTTCTGCACCACGATTTTAGCGGTAAGTGTACCATACGCAAGTTTG---  
---TTCACACTTGTGACGGTGAGATGTGGCCATTGTACCAATTTGCTATCCCTCAACATTGCCCCACCGGAG---  
AAAAGACAACGTGTTCTTCGGCCTACAACAGATTCATCAAGGAGGAAATCCAAAGGATTAAGGCTTGCAATCCA  
GAGATTAGCCACCGTGAGGCATTTAGCACTGCTGCTAAAAATTGGGCACATTTTCTCACATTCACCTTTGGATTA  
*Arabidopsis\_thaliana\_AF136540*

GACCAGCTCTGTTACGTCCATTGCAGCTTCTGCGACACTGTCCTTGCTGTGAGTGTTCCTCCGAGTAGTTTG---  
---TTCAAGACGGTGACGGTCAGATGCGGCCACTGTTGCAACCTTTTGTGCGGTACCAATAGACCCCCAGAG---  
AAGCGACAAAGAGTACCATCTGCATACAACCGATTCATCAAAGAGGAGATCCAACGTATAAAGGCAGGCAACCCT  
GATATCAGCCACAGAGAAGCCTTCAGTGCTGCTGCCAAAACTGGGCTCATTTCCCTCACATACACTTTGGACTC  
*Arabidopsis\_thaliana\_NM179750*

GAACAGCTCTGCTACATCCCTTGCAACTTTTGCAACATAATTCTTGCGGTGAATGTCCCATGCAGCAGCCTG---  
---TTCGACATCGTGACCGTCCGATGCGGTCCTGCACCAATCTGTGGTCTGTAACAACCGTCTCCGGAG---  
AAGCGGCAGCGAGTACCTTCTGCGTACAATCAATTCATAAAAGAGGAAATTCAGAGGATTAAGGCGAATAATCCA  
GACATAAGCCACAGAGAAGCATTGCACTGCTGCCAAGAATTGGGCACACTTTCTCATATTCACCTTTGGTCTA  
*Asparagus\_asparagoides\_AB535099*

GAACACCTGTGCTATGTTTCGATGCGCCTACTGCAGCACAGTTCCTTGCGGTGGGAGTTCATGCAAGAGGATG---  
---ATGGACGCTGTGACTGTGAAATGTGGGCACTGCAACTCG---CTCTCTTACCTCGTGAAGCCTCCAGAG---  
AAGAAGCACCGTCTTCCATCAGCCTATAATCGCTTCATGAGGGAGGAGATACAACGAATCAAGGCTGCAAAATCCA  
GAAATGCCACACCGCGAAGCTTTTAGCACTGCTGCAAAGAATTGGGCGAAGTATGAGCCTCGTGGACTAATTTGT  
*Asparagus\_officinalis\_CV289440*

GAGCATGTCTGCTATGTCCACTGCAATTTCTGCAACACTATCCTTGCGGTCAATGTCCCCAGCAACAATTTGTTT  
---AGCAGTATTGTGACAGTAAGGTGTGGACATTGCGCTAATCTTCTGTGAGTGAATATTCGCCCTCCTGAG---  
AAGAGACAACGTGTTCTTCAGCTTATAACAGATTTATCAAGGAAGAAATTCAAAGGATTAAGGCCAATAATCCA  
GACATCAGTCATAGGGAAGCATTGAGTGTGCCGCAAAGAATTGGGCACATTTTCTCACATCCATTTGGGGCTC  
*Cabomba\_caroliniana\_AB553318*

GAGCATCTCTGCTATGTGCGTTGCAACTTCTGCAGCACCGTTCCTGCGAGTTGGTGTTCCTCCGCAAGAGGCTG---  
---CTTGATACAGTGACGGTGAATGTGGTCACTGCAGCAAT---CTTTCTTTCATCGCAAAAACCACCCGAG---  
AAGAAGCACAGGCTTCTTCAGCATAAATCGGTTTCATGAGGGAGGAGATTCACGACTCAAGGCAGCTGACCCG  
AAGCTGACACACAAAGAAGCCTTCAGCAAGGCAGCTAAAACTGGGCGCGGTTTCGATCCTCAACTGCTAAATATT  
*Cabomba\_caroliniana\_AB553316*

GAGCAGTTGTGCTACGTCCATTGCAACTTCTGTAATACGGTTCAGCGGTGAGCGTTCCTTGCAAGTAGCTTG---  
---TTCAAGTTGTGACTGTGAGGTGCGGCCATTGCACAAACCTCCTCTCTGTTAACAATAAGCCAACCGAG---  
AAGAGGCAGAGAGTGCCATCGGCTTACAACAGGTTTCATCAAAGACGAGATCCAACGAATCAAGGCAGGAAACCCA  
GATATCACTCACAGAGAGACATTCAGCGCTGCTGCCAAGAATTGGGCACATTTCCACATATTCACCTTTGGTCTG  
*Cabomba\_caroliniana\_AB553317*

GAGCAACTCTGCTATGTGCAATGTAGCTTCTGTGACACCATCTTGCTGGTAAGCGTGCCCTGCAGTAGCCTA---  
---CTGAAAGTGGTGCCATTCGATGCGGCCACTGTGGCAACCTTTTCTCCGTAACAATAAACCTCCGGAG---  
AAGAGACACAGAGACCATCTGCTTACAATCGTTTTATAAAGGAAGAAATCCAAAGGCTCAAGGCCAATGACCCC  
AACATCACTCACAGAGAGGCATTGACACAGCTGCTAAAAATTGGGCACACCTTCTCGGTTTCAGCATAAGGCT  
*Cabomba\_caroliniana\_AB553319*

-----  
CAGGTGAATGTGCCGTGCACTAACTCG-----  
CACAACTTGTAACTGTTTCGATGCGGGCACTGTTTCAGGTCTTCAATCAGTAAGCATCAAACCAACAGAA---  
AAGAGGCAACGGGTTCTTCAGCGTATAATCAATTCATCAAGGACGAGATCCAAAGGATAAAAGCTAGCAACCCA  
GAGATCAGCCATAAGGAGGCATTCAGCACAGCTGCCAAAAATTGGGCTCATTTCCTCACATTCAGTTTGAATA  
Cabomba\_caroliniana\_AB126655  
GAGCAAGTGTGTTATGTCCACTGCAATTTTTGCAATACCATCCTTGCGGTGAGCGTTCATGCACCAGCTTG---  
---TTCAATATTGTGACTGTAAGATGTGGCCATTGCACCAATCTCTTGCCAGTAAACAATAGGCCTCCTGAA---  
AAGAGGCAACGCGTCCCCTCGGCTTACAATCAGTTCATCAAGGAAGAGATACAAAGGATCAAGGCCAGTAACCCC  
GAGATAAACCACAGAGAGGCGTTTAGTACTGCAGCAAAAACTGGGCTCATTTCCTCACATTCACTTTGGGCTG  
Canna\_indica\_CRC  
GAGCACCTTTGCTACGTGCGTTGCACGTAAGTGCACGCTGTTCTTGCGGTGGAGTGCCATGCAAGAGGGTG---  
---ATGGACTGTAACTGTGAAATGTGGCCACTGCAATCAC---CTCTCTTTCTCGCCAAACCACCGGAG---  
AAGAAACATAGAATGCCTTCTGCTTATAATCGATTTCATGAAGGAGGAAATACAACGAATTAAGCAGCTCAACCT  
GACATCCCTCATCGAGAAGCTTTTAGCATGGCCGCGAAGAATTGGGCTAAGTGTGATCCTCGGTGCTCGACCATT  
Canna\_indica\_2  
GAGCGCATTGCTATGTCCGCTGCAACTTCTGCAACACCATGCTTGCGGTGAGTGTCCCTGAGAACAGCTTAATG  
---TTCAGTATTGTTACAGTGCATGCGGGCATTGTTCTAATCTTCTATCAGTGAACATGCGTCCACCAGTG---  
AAGAGACAACGTGTACCTTCGGCATATAACAAGTTTATCAAGGAGGAAATACAAGGATAAAGGCTAATAATCCA  
GACATCAGCCATAGAGAAGCATTTAGTACTGCCGCAAAGAATTGGGCCATTTTCCTCACATCCAATTTGGTCTA  
Canna\_indica\_1  
GAGCAGGTTTGTACATCCACTGCAACTTCTGCAACACAATCCTTGCGGTAGTGTTCCTGGGCACAGCTTG---  
---TTCAACATTGTGACAGTAAGATGTGGGCATTGTGCTAATCTGCTGTCTGTGAATTTGCGTCCCCCAGAG---  
AAGAGGCAACGTGTTCTTCTGCATATAACAGGTTTATCAGGGAGGAGATACGAAGGATAAAAGCTAACAACCT  
GATATTAGTCACAAGGAAGCATTTCAGTGTGCTGCAGCAAAGAATTGGGCACACTTTTCCTCATATACATTTTGGGCTA  
Canna\_indica\_3  
-----  
TCTAGTGGTTAATATCCCGAGTGACAATTCA-----  
CTGAATGTTGTGACAGTAAGGTGTGGACTTTGTGCTAATTTACTGTCTGTGAATCCTGCAGCAACTGAG---  
AAACGA---  
CGTGTTCCTTCTGCCTACAACAGATTTATCAAGGAAGAGATACGTGACTGAAGGCAAAGATCCCAACATCAGC  
CACAAGGAAGCCTTCAGCACTGCAG-----  
Citrus\_clementina\_CX308345  
GAGCAACTCTGCTACATCCCCTGCAACTTTTTGCAACATAGTTCTCGCGGTGAGTGTTCCTTGCAAGTACTTG---  
---CTTGACATCGTACTGTCCGATGCGGGCACTGCTCCAATCTATGGTCCGTGAATAATCGTCCCTCCCGAG---  
AAGAGGCAACGAGTACCTTCTGCATACAACAGTTTATAAAAGAGGAGATTGAGAGGATCAAGGCTAATAATCCA  
GATATCAGCCACAGGGAAGCATTTCAGTACTGCCGCAAAGAATTGGGCACACTTTCCCTCACATCCATTTTGGGCTG  
Citrus\_sinensis\_CK936330  
GAACGTGTTTGTGTTATGTTCACTGCAACTACTGCAACACCATTTTAGCGGTGAGTGTTCCTTGCTCAAGTTTG---  
---TTCAACATTGTGACTGTTAGATGTGGGCATTGCGCCAATTTGCTAAATGTAAACATTTCGTCCTCCCGAG---  
AAGAGACAACGAGTTCCTTCTGCATACAATAGGTTTATCAAGGAGGAAATCCAAAGGATTAAGGCCAGTAACCT  
GACATCAGCCATAGAGAAGCTTTTAGCACAGCAGCAAAAAATTGGGCACATTTTCCTCACATTCACTTTGGATTA  
Costus\_pulverulentus\_1  
GAGAAGGTTTGTATATCTTCTGCAACTTCTGCAATACAACCCTTGCGGTGAGTGTTCCTGGAATCAGCTTT---  
---CTCAACATTGTGACTGTGAGATGCGGGCATTGTGCTAATCTGCTCACTGTGAACCTTACGTCCCCCAGAG---  
AAGAGGCAACGTGTTCTTTCAGCATATAACAGGTTTATCAGGGAGGAGATTGAGAGGATAAAGGCAAATAATCCA  
GACATTAGTCATAAGGAAGCCTTCAGTGTGCTGCAGCGAAGAATTGGGCACACTTTTCCTCACATTCATTTGGGCTC

Costus\_spicatus\_3 -----  
CCTTGC GGTTAATGTTCCCTG GAAACAGCTTG-----  
TTCAACATTGTCACAGTGAGATGCGGGCATTGTGCTAATCTGCTGTCCGTGAATTTACGTCCCCCAGAG---  
AAGAGGCAACGTGTTCCCTTCAGCATATAACAG-----

Costus\_spicatus\_5 -----  
TCTCGTGGTTAATGTCCCAAGTAACAACCTG-----  
TCCAGCATTGTCGCAGTAAAATGTGGGCTTTGTGCTAATATACTGTCTGTGGACCTCATAAATCCTACA---  
GAGAAGCGACGTGTTCCCTTCTGCCTATAATAGATTTATAAAGGAAGAGATGCAGAGGCTTAAGGCAAAATATCCT  
AATATTACCCACAAGCAAGCTTTTAGCATTGCAG-----

Costus\_spicatus\_1 -----  
TCCAGAGGATAGATTAATG---  
CTTAACATAATCACAGTTAGATGTGGCCACTGTGCAAATCTACTCCCCTGCATATTCCACCCCCAGAA---  
AAAAGACACCGAGTTCCTTCTGCATACAACAAGTTCATCAAAGAGGAGATTCAAAGGTTGAAGGCTAGTAATCCT  
AGTATGAGTCACAAGCAAGCTTTTCAGTAATGCAG-----

Costus\_spicatus\_4 -----  
TCTAGCGTTAGTGTGCCAGGAAATAGCTTG-----  
TTCAACATCGTGACAATACGATGTGGGCATTGCTCAAATCTGTTGTATGTGAACATGCGTCCCCCGGAG---  
AAGAGG---  
CGTGTTCCCTTCTGCATATAACAGGTTCATAAAGGAGGAAATACAAA-----

Costus\_spicatus\_2 -----  
CCTTGC GGTCAGTGTTCCAGGCAACAGACTG-----  
TTGAACTTGGTGACGGTACGCTGTGGGCATTGTGCAAATCTGCTCTCTGTGCACGTTCCGCCCCCTGAR---  
AAGAGGCAACGTGTTCCATCTGCATATAATAGGTTTATCAAGGAAGAAATCAAAGGATAAAGGCAAATAATCCG  
AGCATTAGCCACAAGGAAGCATTTCAGTGCAGCAG-----

Costus\_spicatus\_CRC2 -----  
-----GTGAAACCGCCTGAG---  
AAGAAACACAGAATGCCTTCAGCATACAATCGCTTCATGAAGGAGGAAATACAGCGAATAAAAGCATCCAATCCT  
GGTATTCCCTCACCGGGAAGCATTTAGCATGGCTGCAAAGAATTGGGCAAAGTGTGATCCTCGTTGCTCAGTTATT

Costus\_spicatus\_CRC1 -----  
GAGCACCTCTGCTACGTGCGTTGCACCTACTGCAACACTGTTCTTGCGGTTGGAGTTCATGCAAGAGGATG---  
---ATTGACACATTAAGTGTGAAATGTGGCCACTGC---AACCATCTCTTTTTCTCGTCAAGCCTCCAGAA---  
AAGAAACACAGAACCCCTTCAGCTTATAATCGCTTCATGAAAGAAGAAATAAAGCGAATCAAAGCAGCTCAACCT  
ACAATTCCCCACCGAGAAGCTTTTAGCATGGCTGCAAAGAATTGGGCAAAGTGTGACCCTCGTAATTCAATTGTT

Cycas\_rumphii\_CB093468 -----  
GAACATTTGTGCTACGTGAGCTGCAGCTTTTGCAGCACCATTCTCGCGGTAAGCGTTCATGCAGCAGCTTA---  
---TTCAAGATCGTTACAGTGAGATGCGGTCAATGCACCAACCTTCTGTGCGGTAACAGACATGTGCCGGAG---  
AAAAGGCAACGAGTTCATCTGCATATAATCGCTTCATAAAGAGGAGATTGAGAGGATCAAAGCCTGTCATCCT  
GAGATAACTCACAGGGAAGCCTTCAGCACCCTGCCAAAACTGGGCACATTTTCTCATATTCACTTCGGGTTG

Elaeis\_guineensis\_EL684075 -----  
GAGCAGCTCTGCTACGTCCACTGCAACTTTTGCACACCGTCTCGCGGTGAGTGTCCCTGCAGCAGTTTG---  
---TTCAAGACGGTGACGGTGTGAGGTGCGGCCACTGCACCAACCTCCTCTCCGTCAACAACAGACCTCCAGAG---  
AAGAGGCAAGAGTTCCTCAGCATACAACCGATTTATCAAGGACGAAATCCAACGCATCAAAGCTGGGAATCCG

GACATCACTCACAGAGAGGCCCTTCAGCGCCGCTGCTAAGAACTGGGCCCATTTCCCCACATCCATTTCGGCCTG  
Elaeis\_guineensis\_EL684122

GAGCAAGTCTGCTATGTCCACTGCAACTTCTGCAACACCATCCTGGTGGTTAGCGTCCCTGGCAGCAACTCC---  
---CTCACCATTGTGACGGTAAGATGCGGGCACTGTGCTAATTTGCTGTCTGTGAATATTTCACTTGCCAGAG---  
AAGAGACAGCGTGTTCCTTCTGCTTACAACAGATTTATTAAGAAGAAATACGAAGACTAAAGGCTACAAATCCT  
GACATTAGCCACAGAGAAGCTTTTCAGCGCTGCAGCAAAGAATTGGGCACACTTTCTCATATCCAATTCGGGCTA  
Eschschozia\_californica\_HQ116795

GAGCAACTCTGTTACGTCCATTGCAACCTTTGTGACACCGTCCCTCGCGGTAAGTGTTCCTTGCAGCAGTTTG---  
---TTCAAGACGGTAACGGTTAGATGTGGACATTGCACAAACCTTCTGTCTGTGAACAACAGACCTCCGGAA---  
AAGAGACAGAGAGTTCCTCTGCTTACAATCGTTTCATCAAGGACGAAATCCAACGCATCAAAGCTGGAAATCCA  
GATATTACCCATAGAGAAGCTTTTCAGTGTCTGCTGCAAAAAATTGGGCTCACTTCCCACACATTTCACTTTGGTCTT  
Eschschozia\_californica\_HQ116796

GAGCAACTTTGTTATGTTTCACTGCAACCTTTGTGACACTGTCCTAGCAGTTAGTGTTCCTTGCAGCAGTTTG---  
---TTAAGACGGTAACGGTTTCGATGTGGACATTGCACTAATCTTCTCTGTGAACAACAGACCCCCAGAA---  
AAGAGACAGAGAGTTCCTCTGCCTACAACCGTTTCATCAAGGAAGAAATCCAACGTATCAAAGCTGGAAATCCA  
GATATTACCCATAGAGAGGCTTTTCAGTGCAGCAGCCAAGAATTGGGCTCACTTCCCACACATTTCACTTTGGTCTC  
Eschschozia\_californica\_HQ116797

GAACACGTTTGCTATGTTCACTGCAACTTCTGCAACACTATTTTAGCTGTTAGTGTACCAGGGACAAGTTTG---  
---TTCAATGTTGTAACAGTTAGATGTGGTCACTTGCTAATTTACTCTCTGTCAACCGCGCTGCCCCAGAG---  
AAAAGGCAACGCGTTCCTCTGCTTATAACCGATTTATCAAGGAAGAGATTCAAAGAATAAAGGCTAGTAATCCA  
GATATTAGTCATAGGGAAGCTTTTAGCTCTGCAGCAAAAAATTGGGCACATTTCCCTCACATTTCACTTTGGACTA  
Eschschozia\_californica\_HQ116798

GAACACGTTTGTTATGTTTCACTGTAACCTTCTGCAACACCATCTTAGCGGTGAGTGTACCAGGAACAAGTTTG---  
---TTGAATGTGGTAACAGTTAGATGTGGTCACTTGCTAATCTATTGTCTGTCAACGTACCTCCCCGGAG---  
AAGAGGCAACGTGTTCCATCCGCGTATAACCGATTTATCAAGGAGGAGATTCAAAGGATAAAGCTACTAATCCA  
GATATTAGTCATAGGGAAGCTTTTAGCACTGCAGCAAAAAATTGGGCTCACTTCCCTCACATTTCACTTTGGATTA  
Eschschozia\_californica\_HQ116799

GAGCAAATCTGCTATATTCCTTGCACCTTCTGCAATATTGTTCTAGCGGTAAGTGTTCATGCAGTAGCTTG---  
---TTTGAGATTGTGACTATAAGATGTGGGCATTGCACTAATTTGTGGTCTGTAAACAATCGGCCTCCTGAA---  
AAGAAGCATAGAGCACCATCTGCATATAATCAGTTCATCAAGGAGGAGATTCAAAGGATTAAGGCCAATCATCCA  
AATATCACTCACAGAGAAGCATTGACTGCTGCACTAAGAATTGGGCACATTTTCTCATACTCATTTTGGGTTG  
Globba\_laeta\_3

CCTTGTGGTTTGTGTTCCAGGAAACGACTTGCCCAACAGCAGCATTGTGACAGTAAGATGTGGGCATTGCTCAA  
CCTTCTCTGTGAACAGCCTCCACCTGAG---  
AAGAGACAACGTGTTCTTCTGTGTATAACAGGTTTATCAAGGAGGAAATACAAAGGATAAAGGCAAACAATCCA  
GATATCAGT-----  
Globba\_laeta\_1

-----GTACGCTGTGGGCATTGTGCAAATCTGCTCTCTGTGCACGTTTCGYCCCCCTGGG---  
AAGAGGCAACGTGTTCCATCTGCATATAATAGGTTTATCAAGGAAGAAATCAAAGGRTAAAAGCAAATAATCCG  
AGCATTAGCCACAAGGAAGCATTGACTGCAAGCAG-----  
Globba\_laeta\_4

-----  
CCGAGTGATAATTCA-----  
TTGAATGTGGCGACTGTCCGATGTGGTCTTTGTGCCAATCTACTCCCTATCAATCAACCGGCAACGGAT---  
CAGAAGCGACGGGTTCTTCTGCCTACAACAGATTTATCAAGGAAGAGATCCGACGCCTGAAAGCTAAAGATCCC

AACATCAGCCACAAGGAAGCTTTTCAGCACTGCAG-----  
Globba\_laeta\_5

-----  
TTC-----  
ATTGATGTGGCGACTGTCCGATGTGGTCTTTGTGCCAATCTACTCCCTATCAATCAACCGGCAACGGAT---  
CAGAAGCGACGGGTTCTTCTGCCTACAACAGATTTATCAAGGAAGAGATCCGACGCCTGAAAGCTAAAGATCCC  
AACATCAGCCACAAGGAAGCTTTTCAGCACTGCAG-----  
Globba\_laeta\_2

-----  
-----ATTGTGACAGTGAGATGTGGCGTTGACTTGTCTGCTATCGGTAACTTACATACCCACAG---  
AAAAGGCAGCGTGTCCATCTGCCTACAACAAGTTTATCAGGGAGGAGATACAAAGGATAAAAGCCAATAACCCCT  
GATATCAGCCATAAGGAAGCTTTTCAGTGCTGCGG-----  
Glycine\_max\_BU579031

GAACGTGTTTGTATGTTCACTGCAACTTCTGCAACACCATTCTAGCGGTTAGTGTTCCATACAGCAGTTTG---  
---CTAACCATAGTGACGGTTAGATGTGGACATTGTGCCAATTTGTTATCAGTTAACATTTCGTCTACAGAG---  
AAGAGACATCGTGTTCTTCTGCTTATAATCGCTTCATTAAGGAGGAAATCAAAGGATTAAGGCTAGTAATCCA  
GATATCAGCCACAGGGAGGCTTTTCAGCTCAGCAGCCAAAACTGGGCACATTTCCCTCACATTCACCTTTGGGTTA  
Glycine\_max\_CA800830

GACCAGCTCTGCTATGTCCATTGCAACTTCTGTGACACTGTCCTCGCGGTGAGTGTTCCCTGCACCAGCTTG---  
---TTCAAGAATGTCAGTGTGAGATGTGGTCATTGCACCAACCTTCTCTCAGTCAACAATAGACCTCCAGAG---  
AAGAGACAGCGAGTTCCTGCTTACAACCGCTTCATCAAGGATGAGATCCAACGTATCAAAGCTGGGAATCCT  
GATATAAGCCACAGAGAGGCCCTTTAGTGACAGCTGCAAAGAATTGGGCCCATTTTCCACACATTCATTTCCGACTC  
Glycine\_max\_CA801979

GAGCAACTCTGCTACATCCCCTGCAACTTTTGAATATTGTTCTTGCAGTGTGAGTGTTCCATGCAGTAGCCTG---  
---TTTGACATTGTGACCGTTCGATGTGGGCACTGCACCAATCTATGGTCCGTGAACAACAGGCCTCCCGAG---  
AAGAGGCAGCGGTACCTTCTGCTTATAACCAGTTTATAAAGGAAGAGATTAGAGGATCAAAGCCAATAATCCT  
GATATCAGTACAGAGAAGCTTTTCAGTACAGCTGCAAAAACTGGGCTCATTTCCTCATATTCATTTCCGGGCTG  
Musa\_acuminata\_GSMUA\_Achr11G03800

GAGCACCTCTGCTACGTCCACTGCAACTTTTGCACACCGACCTCGCGGTGAGTGTTCCCTACACCAGTCTC---  
---TTCAAGACGGTCACCGTGAGGTGTGGTCACTGCACCAACCTTCTCTCGGTCAACAACAGACCTCCAGAG---  
AAGCGGCAGAGAGTTCCTGCTCCGCTACAACCGGTTTCATCAAGGACGAAATCCAACGCATTAAGGCTGGGAATCCC  
GACATCACGCACAGAGAGGCCCTTCAGCGCCGCTGCAAAGAACTGGGCCACTTTCCGCACATCCATTTCCGGTCTG  
Musa\_acuminata\_GSMUA\_Achr11G17520

GAGCAGCTCTGCTACGTCCACTGCAACTTTTGCACACCGTCTCGCGGTGAGTGTTCCCTTACCAGTTTG---  
---TTCAAGACGGTGACTGTGAGGTGTGGCCACTGCACCAACCTTCTCTCCGTCAACAACAGACCTCCAGAG---  
AAGAGGCAGAGAGTTCCTTCCGCATAACAACCGGTTTCATCAAGGACGAAATCCAACGCATTAAGGCTGGGAATCCC  
GACATCACGCACAGAGAGGCCCTTCAGCGCCGCTGCAAAGAACTGGGCTCACTTCCACACATCCATTTTGGTCTG  
Musa\_acuminata\_GSMUA\_Achr1G04480

GAGCACTTGTGTTACGTGCGTTGCACCTACTGCAACACTGTTCTTGCAGTGGAGTTCGAAGCAAGCCGATG---  
---ATGGACACAGTAACAGTGTGGTCACTGCAACCAT---GTCTCCTTTCTTGTGAAACCTCCTGAG---  
AAGAAACACAGAATGCCTTCAGCTTATAATCGCTTCATGAGGGAAGAAATACAGCGAATCAAAGCATCTAAACCC  
GACATTCCTCACCGCAAGCTTTTAGCATGGCTTGAAGAATTGGGCAAAGTGTGATCCTCGTTGCTCAATTATC  
Musa\_acuminata\_GSMUA\_Achr1G24490

GAGCACATCTGCTACGTGCGTTGCAGCTATTGCAACACAGTTCTTAAGGTTGGCGTCCCATCCAAGAGGATG---  
---ATAGACACAGTAACCGTGAGATGCGGTCACTGCGACCAT---CTCTCCTTCTCACGAAACCTCCTGAG---  
AAGAAACACAGAATGCCTTCAGCCTATAATCGCTTCATGAGAGAGGAAATACAGCGAATTAAGCAGCAAAACCT

GATATTCCACACCGAGAAGCTTTTCAGCAAGGCCTCGAAGAAGCTGGGCTAGGTGTGATCCTCGTCGGTCGACCTCG  
Musa\_acuminata\_GSMUA\_Achr1G27150

GATCGCTGTGCTACGTGCGCTGCACCTACTGCAACACTGTTCTTGCGGTTGGCGTCCCTTGCAAGCGGGTG---  
---ATGGACACGGTAACCGTAAAATGTGGTCACTGCAGCCAT---CTCTCCTTTCTGATGAAACCTCCGGAG---  
AAGAAACACAGGATGCCTTCGGCTTACAATCGATTCATGAAGGAGGAAATACAACGAATCAAGGCAGCTAAACCT  
GATATCCCGCACCGAGAAGCTTTTAGCATGGCTTCGAAGAAGCTGGGCCAAGTGTGATCCTCGTTGCTCAACTACT  
Musa\_acuminata\_GSMUA\_Achr3G25290

GAGCACCTTTGCTACATTGCTTGACCTACTGCAACACTCTTCTTGCGGTTGGAGTTCCTCGCCGGTGGTTA---  
---ATGGACAGCGTGACCGTGCATTGTGGTCACTGCAACCAT---CTATCCTTTCTCATCTGCAATTTACCA---  
AAGAAACACAGAGCTCCATCAGCTTACAACACTTCATGAGAGAGGAAATACAAAGAATCAAGGCAGCCAAACCT  
GACATTCCACACCGCGAGGCATTTAGCATGGCTGCAAAGAATTGGGCTAAATGTGATCCTCGCAACTCAGCTAAT  
Musa\_acuminata\_GSMUA\_Achr3G25660

GAGCAAGCTTGCTACGTCAACTGCAACTTCTGCAACACTCCTCTCGTGGTTAATGTCCCAGGCAACAATTTA---  
---CTCAATGTTGTCACAGTAAGATGTGGGCTCTGTGCTAATTTACTGTCTGTGGATATCCAACCAACCGAG---  
AAGCGA---

CGTGTTCATCTGCCTATAACAAGTTCATCAAGGAGGAGATACGGCGGCTGAAGGCAAAAGATCCCGACATCAGC  
CACAGGGAAGCTTTTCAGCACTGCAGCCAAAAGCTGGGCACACTTCCCCGAAATCCATTTTCGGGCCA  
Musa\_acuminata\_GSMUA\_Achr4G01430

GAGCACTTGTGCTACGTCCGCTGCACCTACTGCAACACAGTTCCTTGCGGTTGGAGTTCATGCAAGAGGCTG---  
---ATGGACACAGTCACTGTGAAATGTGGTCACTGTAACCAT---CTCTCCTTCCTCGTCAAACCTCCCGAG---  
AAGAAACACAGGATGCCTTCGGCCTATAATCGCTTCATGAAGGAGGAAATACAACGAATCAAAGCAGCTAAACCG  
GATATTCCTCACCGAGAAGCTTTTAGCATGGCTGCTAAGAATTGGGCTAAATGTGATCCTCGTTGCTCAACCATC  
Musa\_acuminata\_GSMUA\_Achr4G22750

GAGCGCATTTGCTACGTCCACTGCAACTTCTGCAACACCGTCCCTCGCGGTCAGTGTTCCTGGCAACAGCTCC---  
---TTCAACAATGTAGCGGTACGATGCGGGCATTGTTCAATTCTGTTGTCTGTCAACACTCGACCCCCGGAG---  
AAGAGACAACGCGTGCCATCTGCATATAACAAGTTTATCAAAGAGGAGATACAAAGGATAAAGGCTAAGAATCCA  
GAGATCAGCCACAGAGAAGCATTGCACTGCAGCAAAAAATTGGGCACACTTCCCTCATATCCAGTTTGGGCTA  
Musa\_acuminata\_GSMUA\_Achr4G31310

AGTTATGTCCACTGCAACTTCTGCAACTTCTGCAACACCATCCTTGCGGTTAGTGTCCCCGGGAACAGCTTG---  
---TTCAACATTGTCACAGTCCGATGCGGCCATTGCTCTAATCTGCTGTCTGTGGATATTGCGCTCCCGGG---  
AAGAGACAACGCGTACCTTCAGCGTATAACAAGTTTATCAAAGGAGGAAATACAAAGGATAAAGCTAATAATCCA  
CACATTAGCCACAAACAAGCATTGCACTGCAGCGAAGAATTGGGCACACTTCCCTCACATCCATTTTCGGGCAG  
Musa\_acuminata\_GSMUA\_Achr5G08930

GAGCACCTGTGTTACGTGCGTTGCACCTACTGCAACACTGTGCTTGCGGTTGGAGTCCCATGCAAGCCGGTG---  
---ATGGACACGATACCGTGAGATGTGGCCACTGCAACCAT---CTCTCCTTCCTCGTGAAACCTCCTGAG---  
AAGAAACACAGAATGCCTTCAGCTTATAATCGCTTCATGAGGGAGGAGATTGAGCGAATCAAAGCTTCTAAACCC  
GATATTCCTCACCGAGAAGCTTTTAGCATGGCTGCAAAGAAGCTGGGCCAAGTGTGATCCTCGTTGCTCGATCATT  
Musa\_acuminata\_GSMUA\_Achr6G24550

GAGCAACTGTGCTACGTGCGTTGCACCTACTGCAACACTGTTCTTGCGGTTGGAGTTCATGCAAGCGGATG---  
---ATGGATACAATTACTGTGAAATGTGGTCACTGCAACCAT---CTCTCCTTTCTCATGAAACCTCCCGAG---  
AAGAAGCACAGAATGCCTTCTGCTTATAATCGCTTCATGAAGGAGGAAATACAACGAATCAAGGCAGCTAAACCT  
GATATTCCTCACCGGGAAGCATTGCACTGCAGCGAAGAATTGGGCTAAGTGTGATCCTCGTTGCTCGTGCAT  
Musa\_acuminata\_GSMUA\_Achr6G31080

GAGCATATCTGCTACGTCCACTGCAACTTTTTCGCAACACGATCCTTGCGGTTAGTGTTCAGGCAACAAACTG---  
---TTCAACATGGTAACCGTTCGATGCGGACATTGCGCGAATTTGCTCTCTGTGCATGTTGCCCCCAGAA---  
AAGAGACAACGTGTTCTTCTGCTTACAACAGGTTTATCAAAGGAGGAGATTCAAAGGATCAAGGCAAAATAATCCT

AACATTAGCCACAAGGAAGCATTTCAGTGCAGCAGCAAAGAATTGGGCACACTTTCCTCATATTCATATCGGGCGA  
Musa\_acuminata\_GSMUA\_Achr7G01330

GAGCACATTTGCTACGTCCACTGCAACTTCTGCAACACCATCCTTGCGGTGAGTGTCCCCGGCAACAGCTTG---  
---TTCAGCATTGTAGCAGTGCATGCGGGCATTGTTGTAATCTGCTGTCTGTGAACATGCGTCCTCCGGAG---  
AAGAGACATCGCGTGCCGTCTGCATATAACAGGTTTATAAAGGAGGAAATACAAAGGATTAAGGCTAACAAATCCA  
GACATCAGCCACAGAGAAGCATTTCAGCACCGCGGCAAGAATTGGGCACACTTCCCTCACATCCATTTTGGACTC  
Musa\_acuminata\_GSMUA\_Achr7G07130

GAGCAGCTCTGCTACGCTTACTGCAACTTCTGCGACACCATTCTCGCGGTGAGCGTTCCTCGTAGTAGTCTT---  
---TTCATGACGGTGACGGTGAAGTGCGGCAAGTGCACCAACCTTCTCTCTGTCAATAACAAACCTTTGGAG---  
AAAAGGCAGAGAATCCATCCGCATACAATCGATTTATCAAGGATGAAATCCAACGCATAAAAGCTGTGAATCCC  
GACATTACTIONCACAGAGAGGCCCTTCAGTGCAGCTGCAAAAACTGGGCTCACTTTCCGCACATCCATTTCCGGTCTG  
Musa\_acuminata\_GSMUA\_Achr7G07830

GAGCACGTTTGCTACATCCACTGCAACTTCTGCAACACCATCCTCGCGGTAGCGTTCCTCGGAAACAGCATG---  
---TTCAACGTCGTGACAGTCCGGTGCGGCATTGCGCCAATCTGCTGTGCGTCAACTTACGTCCCCCAGAG---  
AAGAGGCAACGCGTTCCTTCCGCCTACAACAGGTTTATCAGGGAGGAGATACAAAGGATAAAAGCTAACAAATCCT  
GATATTAGCCACAAGGAAGCCTTCAGCGCTGCAGCGAAGAATTGGGCACACTTTCCTCACATTCATTTTGGGCTA  
Musa\_acuminata\_GSMUA\_Achr8G04340

GAGCACCTTTGCTACGTTGCTGACCTACTGCAACACTCTTCTGCGGTGGAGTTCATTTCAGGTGGTTG---  
---ATGGACAGAGTACTGTGAATTGTGGTCACTGCCACCAC---TTGTCCTTTCTTTTGTATGAT---  
GTAACACAGAGACCATCAGCTTACAATCACTTCATGAGAGAGGAAATACAGCGAATCAAGGCAGCCAAACCT  
GACATACCTCATCGAGAAGCCTTCAGCATGGCAGCAAAGAATTGGGCTAATTCTGATCCGCGCAACTCATCTGAT  
Musa\_acuminata\_GSMUA\_Achr8G11580

GAGCAGCTCTGCTACGTCCACTGCAACTTCTGCGACACCGTCTCGCCGTGAGTGTTCCTACACCAGTCTC---  
---TTCAAGACGGTGACGGTGTGGCCACTGCACCAATCTTCTCTCCGTCAACAACAGACCTCCGGAG---  
AAGCGGCAGCGAGTTCATCCGCATACAATCGGTTTATCAAAGACGAAATCCAACGCATTAAGCTGGGAATCCC  
GACATCACTCACAGGGAGGCCCTTCAGCGCCGCTGCAAAGAACTGGGCCCACTTTCCGCACATCCATTTCCGACTG  
Heliconia\_caribaeaxbihai\_1

-----AACATTGTAACAATACGATGTGGGCATTGTGCTAATCTGCTGTCTGTCAACTTACGTCCCCCAGAG---  
AAGAGGCAACGCGTTCCTTCTGCATATAACAGGTTTATCAGGGAGGAGATTCAAAGGATAAAAGCTAACAAATCCT  
GATATTAGCCACAAGGAAGCTTTTCAGTGTGCAG-----  
Heliconia\_caribaeaxbihai\_2

-----  
CTTGCGGTAGTGTCCCTGGCAACAGCTTG-----  
TTCAACATTGTAACAGTGCATGCGGGCATTGTTCCAATCTGCTGTCTGTGAATATTCGTCCCCCAGAG---  
AAGAGACATCGTGTGCCTTCTGCGTATAACAGGTTTATCAAAGGAGGAAATACAAAGGATAAAAGGCCAACAATCCA  
GACATCAGC-----  
Heliconia\_caribaeaxbihai\_3

-----  
CCGAGTGATAATTCATTG-----  
GATGTGGCGACTGTCCGATGTGGTCTCTGTGCCAATCTGCTCACTGTCAATCAACCCGCAACGGAG---  
AAGCGA---  
CGTGTTCCTTCTGCCTACAACAGATTTATCAAAGGAAGAGATCAGACGACTGAAAGCTAAAGATCCCAACATTAGC  
CACAAGGAAGCTTTTCAGCACTGCAG-----  
Heliconia\_pendula\_2

-----  
CCTTGCGGTGAGTGTTCCTGGAAACAGCTTG-----



TTCAACATTGTAACAATACGATGTGGGCATTGTGCTAATCTGCTGTCTGTCAACTTACGTCCCCCAGAG---  
AAGAGGCAACGCGTTCCTTCTGCATATAACAGGTTTATCAGGGAGGAGATTCAAAGGATAAAAGCTAACAATCCT  
GATATTAGCCACAAGGAAGCTTTCAGTGCTGCAG-----

*Heliconia\_pendula\_1*-----

CCTTGCGGTTAGTGTTCCAGGCAACAGACTA-----

TTCAACATAGTAACTGTACGATGTGGCCATTGTGCAAATCTACTCTGTACACGTTGCCCCCAGAA---  
AAGAGACAACGCGTTCCTTCTGCATATAACAGGTTTATCAAGGAGGAGATTCAAAGGATAAAAGCAAATAATCCT  
AACATTAGCCATAAGGAAGCATTGAGCGCAGCTG-----

*Heliconia\_pendula\_3*  
-----

GCCAATTTG-----

TTCAACAATGTGACAGTAAGATGTGAGCATTGCTCCAATTTTCTGTCTGTGAATATTCGCCAGTGGAG---  
AAGAGACAACGCATTTCCTTCTGCCTATAACAGATTTATTAAGGAGGAGATAAGACGACTAAAAGCGACAAATCCA  
GACATTAGCCATAGGGAAGCTTTCGGCACTGCAG-----

*Hordeum\_vulgare\_AK250112*

GAACAAGTCTGCTACGTCCACTGCAACTTCTGCAACACCGTACTCGCGGTGAGTGTCCCTGGGAACAGCATG---  
---TTCAACGTCGTGACGGTCCGGTGTGGGCACTGCACGAACCTGCTTTCGGTGAGCGCACGCCCTCCGGAG---  
AAGAGGCAGCGGTTTCCTTCTGCGTACAACAGATTCATCAAGGAAGAGATACGAAGGATCAAAGCAAACAACCCC  
GACATTAGCCACAGGGAAGCCTTCAGCACTGCCGCAAAGAAGTGGGCACATTACCCAAACATCCACTTCGGGCTA  
*Lilium\_longiflorum\_EF363135*

GACCACCTCTGCTACGTTGTTGCACCTACTGCAACACTGTTCTTGCGGTAGGAGTACCATGCAAGCGATTG---  
---ATGGATACGGTGACAGTGAAGTGTGGTCACTGCAACCATATCTCCTTCATCAACGTCAAGCCACCTGAG---  
AAGAAACACAGGCTTCATCTGCTTACAATCGCTTCATGAAGGAGGAAATACAGCGAATCAAAGCTGCCAAGCCT  
GATATTCCTCATCGAGAAGCTTTTAGCATGGCTGCAAAGAAGTGGGCTAAGTGTGACCCTCGGGCAACAAATACT

*Marantochloa\_leucantha\_1*-----

CCTTGCGGTGAGTGTTCCAGGGAGCAGGCTC-----

TTCAACATAGTAACTGTGAGATGCGGCCATTGTGCAAATCTGCTCACTGTGCACGTTGCCCCCAGAA---  
AAGAGACAGAGAGTTCCTTCTGCATATAACAGGTTTATAAGAGAGGAGATTCAAAGGATAAAAGACAAGCAACCCC  
AATATCACCCACAAGGAAGCATTGAGTACAGCAG-----

*Marantochloa\_leucantha\_2*-----

CCTTGCGGTGAGTGTTCCAGGCAACAGACTG-----

TTGAACTTGGTGACGGTACGCTGTGGGCATTGTGCAAATCTGCTCTGTGCACGTTGCCCCCCTGAG---  
AAGAGGCAACGTGTTCCATCTGCATATAATAGGTTTATCAAGGAAGAAATTCAAAGGATAAAAGCAAATAATCCG  
AGCATTAGCCACAAGGAAGCATTGAGTGCAGCAG-----

*Marantochloa\_leucantha\_3*  
-----

GATAAATTG-----

TTCGACACTGTGACAGTAAGATGTGAGCATTGCTCCAATTTGCTGTCTGTGAATATTCACCCAGTTGAG---  
AAGAGACAACGCATTTCCTTCTGCCTATAACAGATTTATTAAGGAGGAGATAAGACGATTAAGCCACGAATCCA  
GACATCAGCCACAAGGAAGCTTTCAGCACTGCAG-----

*Musa\_acuminata\_1*-----

CCTCGCGGTGAGTGTTCCCTGGCAACAGCTCC-----

TTCAACAATGTAGCGGTACGATGCGGGCATTGTTCAAATCTGTTGTCTGTCAACACGCGACCCCCAGAG---  
AAGAGACAACGCGTGCCTTCTGCATATAACAAGTTTATCAAGGAGGAGATACAAAGGATAAAAGGCTAAGAATCCA  
GAGATCAGCCACAGAGAAGCATTGAGCACTGCAG-----

*Musa\_acuminata\_2*

GAGCACATTTGCTACGTCCACTGCAACTTCTGCAACACCATCCTTGCGGTGAGTGTCCCCGGCAACAGCTTG---  
---TTCGGCATTGTAGCAGTGCATGCGGGCATTGTTGTAATCTGCAGTCTGTGAACATACGTCCTCCAGAG---  
AAGAGACATCGCGTGCCGTCTGCGTATAACAGGTTATAAAGGAGGAAATACAAAGGATTAAGGCTAACAATCCA  
GGCATCAGCCACAGAGAAGCATTTCAGCACCGCGCAAAGAAGTGGGCACACTTCCCTCACATCCATTTTGGACTC

Musa\_basjoo\_2

CCTCGCGTTAGCGTTCCCGGAAACAGCATG-----

TTCAACCTCGTGACAGTCCGGTGCGGGCATTGCGCCAATCTGCTGTCGGTCAACTTACGTCCCCCAGAG---  
AAGAGGCAACGCGTTCCTTCTGCCTACAACAGGTTTATCAGGGAGGAGATACAAAGGATAAAAGCTAACAATCCT  
GATATTAGCCACAAGGAAGCCT-----

Musa\_basjoo\_6

-----TCCGTGAATCAA---CCAACAGAG---  
AAGCGT---

CGTGTTCCTTCTGCCTATAACAGGTTTCATCAAAGAGGAGATACGTCGGCTGAAGACGAAAAATCCCAACATTAGC  
CACAAGGAAGCTTTCAGCACCGCA-----

Musa\_basjoo\_3

CTTCTGCAACACCATCCTTGCGGTTAGTGTCCCCGGGAACAGCTTG-----

TTCAACATTGTCACAGTCCGATGCGGCCATTGCTCTAATCTGCTGTCTGTGGATATTCGCGCTCCCCGGG---  
AAGAGACAACGCGTACCTTCAGCGTATAACAGGTTTATCAAGGAGGAAATACAAAGGATAAAAGCTAATAATCCA  
CACATTAGCCACAACAAGCATTTCAGCACTGCGGCGAAGAATTGGGCACACTTCCCTCACATCCATTTTCGGGCTG

Musa\_basjoo\_5

GAGCACATTTGCTACGTCCACTGCAACTTCTGCAACACCATCCTTGCGGTGAGTGTCCCCGGCAACAGCTTG---  
---TTCGGCATTGTAGCAGTTCGATGCGGGCATTGTTGTAATCTGCTGTCTGTGAACATACGTCCTCCGGAG---  
AAGAGACATCGCGTGCCGTCTGCGTATAACAGGTTATAAAGGAGGAAATACAAAGGATTAAGGCTAACAATCCA  
GACATCAGCCACAGAGAAGCATTTCAGCACYGCRGCAAARAAYTGGGCACACTTCCCTCAYATCCAATTTGGRCTM

Musa\_basjoo\_4

GAGCACATTTGCTACGTCCACTGCAACTTCTGCAACACCGTCTCGCGGTGAGTGTCCCTGGCAACAGCTCC---  
---TTCAACAATGTAGCGGTACGATGCGGGCATTGTTCAAATCTGTTGTCTGTCAACACGCGACCCCCAGAG---  
AAGAGACAACGCGTGCCCTTCTGCATATAACAAGTTTATCAAGAGGAGATACAAAGGATAAAAGGCTAAGAATCCA  
GATATCAGCCACAGAGAAGCATTTCAGCACTGCAGCAAAA-----

Musa\_basjoo\_1

GAGCATATCTGCTACGTCCACTGCAACTTTTGAACACGATCCTTGCGGTTAGTGTTCAGGCAACAAACTG---  
---TTCAACATGGTAACCGTTCGATGCGGACATTGCGCGAATTTGCTCTCTGTGCATATTCGCCCCCAGAA---  
AAGAGACAACGTTCCCTTCTGCTTACAACAGGTTTATCAAGGAGGAGATTCAAAGGATCAAGGCAAATAATCCT  
AGCATTAGCCACAAGGAAGCATTTCAGTGCAGCAGCAAAGAATTGGGCACACTTT-----

Nymphaea\_alba\_AB092980

GAGCAACTCTGCTATGTGCAGTGCAGTTTCTGTGATACCATCTTGCTGGTAAGTGTCCCTTGCAGTAGCTTG---  
---CTGAAAGTGGTGCCTGTCAGATGTGGCCATTGTAGCAACCTTTTTTTCGGTAAACAATAAGCCTCCAGAG---  
AAGAGACACAGAGCTCCTTCTGCTTACAACCGTTTATAAAGGAAGAGATCCAGAGGCTTAAGACCAGTGAGCCA  
AACATCAGCCACAGGGAGGCATTTCAGCACTGCTGCTAAAAATTGGGCACACATGCCTAGAATTCAGCATAAACCA

Nymphaea\_colorata\_AB092981

GAGCAACTCTGCTATGTGCAGTGCAGTTTCTGTGATACCATCTTGCTGGTAAGTGTCCCTTGCAGTAGCTTG---  
---CTGAAAGTGGTGCCTGTCAGATGTGGCCATTGTAGCAACCTTTTTTCAGTCAACAATAAACCTCCAGAG---  
AAGAGACACAGAGCTCCTTCTGCTTACAACCGTTTATAAAGGAAGAGATCCAGAGGCTCAAGACCAGTGAGCCA  
AGCATCAGCCACAGGGAGGCATTTCAGCACTGCCGCTAAAAATTGGGCACATTTACCTCGAATTCAGCATAAACCA

Orchidantha\_siamensis\_3

CCTCGCGTTAGTGTCCCTGGCGACAGCTTG-----  
TTCAACATTGTAACAGTACGATGCGGTCATTGTTCTAATCTTCTTTCTGTGAACATGCGTCCCCCAAG---  
AAGCGACAACGTGAACCTTCTGCATATAACAGGTTTATCAAGGAGGAAATACAAAGGATAAAGGCTAACAATCCG  
GACCTCAGCCACAGAGAAGCATTGAGCACTGCAG-----  
*Orchidantha\_siamensis\_1*  
CCTCGCGTTAGTGTCCCWGGCRACAGMWTG-----  
TTCAACATWGTRACWGTACGATGCGGKCAATTGTACAAATCTACTCTCTGTACATGTTGCCCCCAGAA---  
AAGAGACAACGCGTTCCTTCTGCTTATAACAGGTTTATCAGGGAGGAGATACAAAGGTTAAAGGCTAATAATCCT  
AACATTAGCCACAAGGAAGCATTGAGTGCAGCAG-----  
*Orchidantha\_siamensis\_2*  
TCTTGCAGTTAGTGTTCGGAAATTGCTTG-----  
TTCAACATTGTGACAATAAGATGCGGGCATTGTGCTAATCTGCAGTCCGTGAACCTACGTCCCCCGGAGACGAAG  
AGGCAGCGGTTCTTCTGCATACAACAGGTTTATCAGAGAGGAGATCCAAAGGATAAAAGCTAACAATCCTGAT  
ATTAGCCATAAGGAAGCTTTCAGTGCTGCGG-----  
*Orchidantha\_siamensis\_4*  
-----TCGGTGAATATCCAACCAACGGAG---  
AAGCGA---  
CGTGTTCCTTCTGCCTATAACAGATTTATCAAGGAGGAGATCCGGCGACTAAAGGAAACAAATCCCAACATTAGC  
CACAAGGAAGCATTGAGCAGCAGCAG-----  
*Oryza\_sativa\_AB106553*  
GAGCACCTGTGCTACGTGCGCTGCACCTACTGCAACACCGTGCTCGCGGTTGGAGTCCCATGCAAGAGGCTG---  
---ATGGACACCGTGACCGTCAAATGTGGCCACTGCAACAAC---CTCTCCTTCTCGTGAAGCCCCCAGAG---  
AAGAAACACCGCCTCCCATCTGCTTACAACCGCTTCATGAGGGAGGAAATACAGCGTATCAAAGCTGCCAAGCCA  
GATATCCCTCACAGGGAGGCCTTCAGCATGGCTGCCAAGAAGTGGGCGAAGTGCAGCCCCCGCTGCTCATCGACG  
*Oryza\_sativa\_AB274013*  
GAGCATGTTTGCTATGTCAACTGCAACTATTGCAACACTATCCTTGTGGTGAATGTGCCAAACAATTGTTCC---  
---TACAACATTGTGACTGTTAGATGTGGGCATTGCACAATGGTGTCTCCATGGATATACGTCCCCCTGAG---  
AAAAGACAGCGTGTCCCATCTGCATACAACAGATTCATCAAGGAGGAGATACAGAGGATTAACAGCAATCCT  
GAGATTAGCCACAGGGAGGCATTGAGTGTGCTGCAAAGAAGTGGGCTCATCTTCCCCGGCTCCATTTTGGCCTC  
*Oryza\_sativa\_AB274014*  
GAGCATGTGTGCTACGTGCACTGCAACTTCTGCAACACAATTTTTCGCGGTCAGTGTTCCAAGCAATAGCATG---  
---CTAAACATCGTGACCGTCCGTTGTGGCCATTGCACTAGCCTGTTGTGAGTGAACGTGCGACCTCCAGAG---  
AAGAGGCAGCGGTTCCCTTCAGCTTATAACAGATTTATCAAGGAAGAGATCCGGAGGATAAAAGCAAACAATCCT  
GACATAAGCCACAGAGAAGCCTTCAGTACTGCAGCAAAGAATTGGGCGCATTTCCTCAACATCCATTTCCGGTTA  
*Oryza\_sativa\_AB274015*  
GAGCAGCTCTGCTACGTGCACTGCCACTACTGCGACACCGTGCTCGTGTGAGCGTGCCGAGCAGCAGCCTG---  
---TTCGAGACGGTGACGGTGGGTGCGGCCACTGCAGCAGCCTCCTCACCGTCAACAACAGACCTCCGGAG---  
AAGAGGCAGCGTGTGCCATCGGCGTACAACCGCTTCATCAAGGACGAAATCCAACGCATCAAGGCTGGCAATCCC  
GACATCTCGCACAGGGAGGCCTTCAGCGCGGCTGCCAAGAAGTGGGCGCACTTTCCGCACATCCACTTTGGACTG  
*Oryza\_sativa\_AB274016*  
GAGCAGCTCTGCTACGTGCACTGCAACTGCTGCGACACCATCCTCGCCGTGGGCGTGCCGTGCAGCAGCCTG---  
---TTCAAGACGGTGACGGTGGGTGCGGCCACTGCGCCAACCTGCTCTCCGTCAACAACAGGCCTCCGGAG---  
AAGCGTCAGAGAGTCCCATCTGCGTACAACCGGTTTCATCAAGGATGAGATCCAGCGGATCAAGGCCGGCAACCCG  
GACATCAGCCACCGGGAGGCGTTGAGTGCAGCCGCAAAGAATTGGGCCCATTTCCCTCACATCCATTTTGGCCTC  
*Oryza\_sativa\_AB274017*

GAGCAGCTCTGCTACGTGCACTGCAACTTCTGCGACACCATCCTCGCGGTGGGCGTGCCGTGTAGCAGCCTG---  
---TTCAAGACGGTCACCGTGCGGTGCGGCCACTGCGCCAACCTGCTCTCCGTCAACAACAGGACTTCAGAG---  
AAGCGGCAGAGGGTCCCTCGGCATACAACCGATTATCAAAGATGAGATACAACGCATCAAGGCAAGCAATCCG  
GACATCACCCACAGGGAGGCTTTAGCGCTGCTGCCAAGAAGTGGGCCATTTCCACACATCCATTTTGGCCTG  
Oryza\_sativa\_AB274018

GAGCAAGTGTGCTATGTGCACTGCAACTTCTGCAACACGATTCTCGCGGTGAGTGTCCCAGGAAACAGCATG---  
---CTGAACATCGTGACCGTCCGGTGTGGGCACTGCACGAATCTGCTGTGAGTGAACGCTCGCCCTCCAGAG---  
AAGAGGCAAAGGTACCTTCAGCCTATAACAGATTTATTAAGGAAGAGATACGAAGGATCAAAGCAAACAACCCC  
GACATTAGCCACAGGGAAGCCTTCAGCACAGCAGCCAAGAATTGGGCACATTATCCAAACATCCATTTTGGCCTA  
Oryza\_sativa\_AB274019

GAGCGGCTAGGCTGCGTGCACTGCACTTCTGCGCCACCGTGTGCTGGTGGAGCGTGCCGTGCAGCAGCGTG---  
---CTCAGGGTGGTGGCCGTGCACTGCGGCCACTGCTCCGGCATCCTCTCCGCCGTCAACAAGCCGCCAGGG---  
AGGAAGCAGCGGACGCCGTCTGCCTACAACCTGTTTCGTCGAAGGAAGAGATAAAGAGGATCAAAGCATGGAGCCT  
AACATCACCCACAACAAGCATTTCAGCACAGCTGCTAAAAACTGGGCTCACTTACCCAGAATCCAGCAGAAGCGA  
Phyllostachys\_edulis\_FP099409

GATCAGCTCTGCTACGTGCACTGCAACTTCTGCGACACCATCCTCGCGGTGGGCGTGCCGTGCAGCAGCATG---  
---TTCAAGACGGTCACCGTGCGGTGCGGCCACTGCGCCAACCTGCTATCCGTCAACACCAGGCCTGCAGAG---  
AAGCGGCAGAGAGTTCCTCGGCTTACAACCGATTATCAAAGACGAGATACAGCGCATCAAGGCCAGCAACCCG  
GACATCACCCACAGGGAGGCTTTAGCGCAGCTGCCAAGAATTGGGCTCATTTCCCGCACATTATTTCCGGTCTG  
Picea\_glauca\_BT115385

GATCACCTCTGCTACGTTCACTGCGACTTTTTGTAGCACAATCCTCGCGGTAAACGTTCCATGCAACAGCTTA---  
---TACAGGATTGTTACAGTCCGATGCGGTCACTTGCCTAACCTCTTGTGCGTAAACTACAGACAGCCCCGAG---  
AAGAAACAGCGGTTCCATCTGCATATAATCGTTTTATTAGAGACGAAATCCAGAGGATCAAAGCCAACAATCCA  
AAAATAACTCACAAGGAAGCTTTTAGCGCCGCTGCCAAGAAGTGGGCACATTATCCTCATATTCATTTCCGGTTG  
Picea\_sitchensis\_BT123811

GGGCATTTGTGCTATATTAGTGAATTATTGCAGCACTGCTTAGCGGTGAATGTCCCAGGAGTAGTTTA---  
---TTGGAGATTGTCCCAGTGCAGTGCAGTCACTTGCACCAGCCTTCTATCAGTTAACTGCGGGACTACAGAA---  
AAAAGACAACGAGCTCCATCCGCCTATAACCGATTATAAGAGCGGAAATACAGAGGATCAAAGCCGTCAATCCG  
GAGATCAGCCATAGGGAAGCTTTAGCGCTGCTGCCAAGAAGTGGGCTCACTTAGGGTTGATGCTGCCGGATAAC  
Picea\_sitchensis\_BT124509

GAGCAGCTGTGCTACGTGCACTGTAACCTTTGCAAGCACCATTCTAGCGGTGAGCGTTCAGTCCAGTAGCTTA---  
---TTCAATATAGTACAGTTCGCTGTGGCATTGCAACCATCTCCTATCAGTTAACAGCATAACACCTGAA---  
AAGAGACAACGAGTACCGTCCGTGTACAATCGTTTTATAAAGAGGAAATCAAAGAATCAAAGCCAAAAATCCG  
GACATAAGGCACAAGGAGGCTTTAGTGCCTGCAAAAAATTTGGGCTCATTTTCTCATATACATTTCCGATTG  
Picea\_sitchensis\_EF086340

GATCACCTCTGCTACGTTCACTGCGACTTTTTGTAGCACAATCCTCGCGGTAAACGTTCCATGCAACAGCTTA---  
---TACAGGATTGTTACAGTCCGATGCGGTCACTTGCCTAACCTTTTTGTGCGTAAACTACAGACAGCCCCGAG---  
AAGAAACAGCGGTTCCATCTGCATATAATCGTTTTATTAGAGACGAAATCCAGAGGATCAAAGCCAACAATCCA  
AAAATAACTCACAAGGAAGCTTTTAGCGCCGCTGCCAAGAAGTGGGCACATTATCCTCATATTCATTTCCGGTTG  
Pinus\_taeda\_DR100835

GATCACCTCTGCTACGTTCACTGCGACTATTGCAACACAATCCTCGCGGTAAACGTTCCATGCAACAGCTTA---  
---TACAGGACTGTTACAGTCCGATGCGGTCACTTGCATAAACCTCCTGTGCGTAAACTACAGACAACCCGAG---  
AAAAACAGCGGTTCCATCTGCATATAATCGTTTTATTAGAGATGAAATCCAGAGGATCAAAGCCCACAATCCA  
AAAATAACTCACAAGGAAGCTTTAGCGCCGCTGCCAAGAAGTGGGCACATTATCCTCATATTCATTTGGGATG  
Ruscus\_aculeatus\_AB168115

GAGCATGTCTGTTATGTCCACTGCAACTTCTGCAACACCATCCTCGTGGTAAATGTCCCTGGAACAATTTG---

---TTCAACATTGTGACCATAAGGTGTGGCATTGTGCTAATCTTCTATCAGTGAATATTCGCTCTCCTGAG---  
AAGAGACAACGTGTTCCCTCAGCTTATAATAGATTTATCAAGGAGGAGATTCAAAGAATCAAGGCCAACAATCCT  
GACATTAGCCATAGGGAAGCATTGAGTGTGCTGAGCAAAGAATTGGGCACATTTTCCACACATCCATTTGGGCTC  
Saccharum\_officinatum\_CA277458  
GAGCATGTGTGCTACGTGCACTGCAACTTCTGCAACACAATTCTCGCGGTGAGTGTCCCGAGTCACAGCATG---  
---CTGAACATCGTGACAGTCCGTTGTGGGCACTGCACTAGCCTGCTGTCAGTGAACGTGCGTGTCCAGAG---  
AAGAGGCAACGCGTTCCTTACGATATAACAGATTTATTAAGGAAGAGATACGAAGGATTAAGCAAGCAACCCA  
GACATAAGCCATAGGGAAGCCTTACGACTGAGCGAAGAATTGGGCACATTTTCAAACATTCATTTTGGACTA  
Schumannianthus\_virgatus\_1 -----  
CCTTGGCGTCACTGTTCCAGGCAACAGACTG-----  
TTGAACTTGGTACGGTACGCTGTGGGCATTGTGCAAATCTGCTCTGTGACGTTGCCCCCTGAA---  
AAGAGGCAACGTGTTCCATCTGCATATAATAGGTTTATCAAGGAAGAAATCAAAGGATAAAGGCAAATAATCCG  
AGCATTAGCCACAAGGAAGCATTGAGTGTGAGCAG-----  
Schumannianthus\_virgatus\_3 -----  
GCTTGGCGTTAATGTCCCTGGAACAATTTG-----  
TTGAAGATTGTGGCTGTAAGATGTGGTCATTGTTCTAATCTGCTTTCTGTGCATACACCTTCTCCAGAG---  
AAGAAACAACGCGTGCCTTCTGCGTATAACAGGTTTATCAAAGAGGAAATACAAAGGATAAAGGCTAATAATCCA  
GAAATTAGCCACAGAAAAGCATTGAGCAGTGTGAG-----  
Schumannianthus\_virgatus\_2 -----  
CCTAGCGTTGGYGTTCCTGGAAGCAGCTT-----  
TTCAACATTGTGACTGTGAGATGTGGGCACTGCGCTAATCTGCTGTGTGAACTTGGCGCCCCCAGAG---  
AAGAGGCAACGTGTTCCATCTGCATATAACAGGTTTATCAGGGAGGAGATACAAAGGATAAAGCGAACAATCCT  
GATATCAGTCACAAGGAAGCTTTCAGTGTGAG-----  
Sorghum\_bicolor\_XM002452807  
GAGCAGCTCTGCTACGTGCACTGCAACTGCTGCGACACCATCCTCGCCGTGCGGCTGCCTTGCAGCAGCCTG---  
---TTCAAGACGGTGACGGTGCCTGCGGCCACTGCGCAACCTACTCTCCGTCAACAACAGGCCTCCGGAG---  
AAGCGGCAGAGAGTCCCCTGCGCATAACAACCGTTTATCAAGGACGAGATCCAGCGCATCAAGGCCGGGAACCCG  
GACATCACCCACCGGGAGGCGTTCAGCGCAGCCGCAAAGAATTGGGCCATTTCCACACATCCACTTCGGCCTC  
Sorghum\_bicolor\_XM002448190  
GAGCAGATCTGCTACGTGCACTGCACTACTGCGACACCATCCTCGCGGTGGGCGTGCCGTGCAGCAGCTTG---  
---TTCCAGACGGTACCGTGCCTGCGGCCACTGCTCCAACCTGCTCTACGTCAACAACAAAACCTTCAGAG---  
AAGCGGCAGAGAGTTCCTTCCGCGTACAACCGTTTATCAAGGATGAGATCCAGCGCATCAAGGCCAGCAATCCG  
GACATCACTCACAGGGAAGCTTTCAGCGCGGCTGCCAAGAATTGGGCCATTTCCCGCACATCCATTTGGTCTC  
Sorghum\_bicolor\_XM002459322  
GAGCATGCCTGCTATGTCAATTGCAACTATTGCAACACTATCCTGGTGGTGAATGTGCCAAACAGTTGTTCC---  
---CACAACATTGTGACTGTCAAATGTGGCATTGTACAATGGTGTCTCTATGGATATAAGACCCCCAGAG---  
AAGAGGCAACGTGTTCCATCAGCATAACAACAGATTTATCAAGGAAGAAATACAAAGGATAAAGACGAGCAACCCA  
GAGATTAGCCACAGGGAAGCATTGAGTGTGAGCGAAGAATTGGGCTCATCTTCCCTCGGCTCCATTTGGCCTC  
Sorghum\_bicolor\_XM002464354  
GAGCAGCTCTGCTACGTGCACTGCCACTTCTGCGACACCGTCTCGTGTGAGCGTGCCACGAGCAGCTTG---  
---TTCAAGACGGTACGGTACGATGCGGCCACTGAGCAGCTTGTCTACTGTCAACAACAGACCTCCGGAG---  
AAGAGGCAACGCGTGCCTGCGGCTACAACCGTTTATCAAGGACGAAATCCAACGCATCAAGGCTGGCAATCCC  
GACATCTCGCACAGGGAGGCTTTCAGCGCGGCCGCAAGAATTGGGCGCACTTTCCACACATCCACTTTGGACTC  
Strelitzia\_sp\_5 -----  
CCTCACGGTTAACATTCCATGCGATAAATTG-----  
TTCGACACTGTGACAGTAAGATGTGAGCATTGCTCCAATTTGCTGTCTGTGAATATTCGCCCAGTTGAG---

AAGAGACAACGCATTCTCTGCCTATAACAGATTTATTAAGGAGGAGATAAGACGATTA AAAAGCCACGAATCCA  
GACATCAGCCACAAGGAAGCTTTCAGCACTGCAG-----  
Strelitzia\_sp\_3 -----  
CCTTGCGGTCAGTGTCCCTGGCAACAGCTTG-----  
TTCAACATTGTGACAGTTTCGATGCGGGCATTGTTCTAATCTGCTTTCTGTGAACATGCGTCCGCCGGAG---  
AAGAGACAACGCGTACCTTCTGCATATAACAGGTTTATCAAGGAGGAAATACAAAGGATAAAAGGCTAACAATCCA  
GACATCAGCCACAGAGAAGCCTTTCAGCACTGCAG-----  
Strelitzia\_sp\_2 -----  
CCTTGCGGTTAGTGTTCCTGGAAACAGCTTG-----  
TTCAACATTGTGACTGTACGGTGCGGGCATYGTGCTAATCTGCTGTCTGTGAACCTACGTCCCCCAGAG---  
AAGAGGCAACGTGTTCTTCTGCATATAACAGGTTTATCAGGGAGGAGATACAAA-----  
-----  
Strelitzia\_sp\_4 -----  
-----  
CCCTGGCAACATCTTG-----  
TTCAACATTGTAACAGTACGATGCGGGCATTGTTCTAATCTGCTGTCTGTGAATATTCATCACCCCTGAG---  
AAGAGACAACGCGTGCCTTCTGCATATAACAGGTTTATCAAGGAGGAAATACAAAGGATAAAAGGCAAACAATCCA  
AACATCAGCCACAGAGAAGCATTTCAGCACTGCAG-----  
Strelitzia\_sp\_1 -----  
CCTCGCGTTAGTGTCCAGGCAACAGATTG-----  
TTCAACATAGTAACTGTACGATGTGGGCATTGCGCAAATCTACTCTTTGTACATATTCGCCCCCCAGAA---  
AAGAGACAACGTGTTCTTCTGCTTATAACAGGTTTATCAAGGAGGAGATTCAAAGGTTAAAGGCTAATAATCCT  
AA-----  
Triticum\_aestivum\_BT009106  
GAAGAAGTCTGCTACGTGCACTGCAACTTCTGCAACACCGTACTCGCGGTGAGTGTCCCTGGGAACAGCATG---  
---CTCAACATCGTGACAGTCCGGTGCGGGCACTGCACAAACCTACTTTCGGTGAGCGCACGTCTCCTGAG---  
AAGAGGCAGCGTGTTCCTTCGGCGTACAACAGATTTCATCAAGGAAGAGATACGAAGGATCAAAGCAAACAACCCC  
GACATTAGCCACAGGGAAGCTTTCAGCACTGCCGCAAAGAACTGGGCACATTATCCAAACATCCATTTTCGGTCTA  
Triticum\_aestivum\_EU099585  
GAGCATGTCTGCTACGTGCGCTGCAACTTCTGCAACACAATTCTCGCGGTGAGTGTCCCAAGTAATAGCATG---  
---CTGAACATCGTACCCTCCGTTGCGGGCACTGCACTAGCCTGCTGCGGTGAACATGAGACCTCCTGAG---  
AAGAGGCAGCGGTACCTTCAGCGTATAACCGATTTATTAAGGAGGAGATACGAAGGATAAAAACAACAATCCT  
GACATAAGCCACAGAGAAGCCTTTCAGCACCGCAGCAAAGAATTGGGCGCATTTCCAAACATTCATTTTCGGGCTA  
Triticum\_aestivum\_AB470269  
GAGCACCTCTGCTACGTGCGCTGCACTGCAACACCGTCTCGCGGTTGGGGTTCATGCAAGAGGCTG---  
---ATGGACACGGTGACTGTGAAATGCGGCCACTGCAACAAC---CTCTCCTTCTCGTGAAGCCCCCAGAG---  
AAGAAACATCGCTACCCTGCTTACGCTTTCATGAGGGAGGAAATACAACGTATCAAAGCTGCAAAGCCA  
GACATCCCTCACAGAGAAGCCTTTCAGCATGGCTGCTAAGAAGTGGGCGAAGTGCACCCCTCGCTGCTCATCGACT  
Triticum\_aestivum\_AY330228  
GAGCAGCTCTGCTACGTGCACTGCCACTTCTGCGACACCGTCTCGTCTGAGCGTGCCGAGCAGCAGCCTC---  
---TTCAAGACGGTGACAGTGCAGTGCAGGCACTGCAGCAGCCTGCTCACCGTCGACAACAGACCTCCGGAG---  
AAGAGGCAGCGGTGCCGTGCGCGTACAACCGCTTTCATCAAGGACGAAATCCAACGCATCAAGGCTGGCAATCCC  
GACATCTCGCACAGGGAGGCCCTTTCAGCGCGGCTGCCAAGAAGTGGGCTCACTTTCGCATATCCACTTTGGCCTC  
Welwitschia\_mirabilis\_DT583102  
GAGCAATTGTGCTACGTTCTTGCACAAACTGCAGCACCGTTCTAGCGGTGAGTGTACCGCTGAAGAGCTTG---  
---TTAAGGTCGTTACAATCAGGTGTGGACTGCAACAATTCATATCAGTTGACCCAAGAGCTCCCGAG---

AAAAACAACGCATTTCTTCTGCATATAATCGATTTATCAAGGAAGAGATTAGAGGATTAAGCAGGCAACCCT  
AATATGAGCCACCGGAAGCTTTTCAGCACAGCTGCTAAGAAGCTGGGCTCTTTTCCCCTACATGCAATTAGGCCTC  
Zantedeschia\_aethiopica\_AJ700396

GAGCATGTCTGCTACGTCCACTGCAACTTCTGCAACACCATCTTGGCGGTTAGCGTCCCATCCAACAACCTA---  
---TTCAACATTATCACGGTGAGATGCGGGCACTGTTCTAATCTGTTGTCTGTCAATATGCGCCCTCCTGAA---  
AAGAGGCAACGTGTTCCATCTGCGTATAACAGGTTTATTAAGGAGGAGATACAAAGGATAAAGGCCAATAACCCG  
GATATTAGCCATAGGGAAGCTTTTCAGTGTGCGAGCAAAGAATTGGGCTCATCTTCCTCACATCCACTTCGGGCTT  
Zea\_mays\_AY103851

GACCATGTGTGCTATGTGCACTGCAACTTCTGCAACACAGTTCTCGCGGTGAGTGTCCCGGGGAACAGCATG---  
---CTCAGCATGGTGACAGTTCGGTGTGGGCACTGCACAAATCTACTGTGAGTGAATCGTCCGGCTCCTGAG---  
AAGAGGCAGCGGTTCCGTGCGCGTATAACAGATTCATCAAGGAAGAGATTCGAGGATCAAGGCCAACAACCCG  
GACATTAGCCACAGGGAAGCTTTCAGCACAGCAGCCAAGAAGCTGGGCACATTATCCGAACATCCATTTGGGCTTA  
Zea\_mays\_NM00115258

GAGCACCTGTGCTACGTCCGCTGCACCTACTGCAACACCGTGTGCGCGTGGGGTTCATGCAAGAGGCTG---  
---ATGGACACGGTGACTGTCAAGTGCAGGCACTGCAACAAC---CTCTCCTACCTCGTCAAGCCCCGGAG---  
AAGAAACACCGCCTCCCATCTGCTTATAATCGCTTCATGAGGGAGGAGATTCAGCGCATCAAAGCTGCGAAGCCA  
GATATCCCTCACAGGGAGGCCTTTCAGCATGGCTGCCAAGAATTGGGCAAAGTGTGACCCGCGCTGCTCGACGGCT  
Zea\_mays\_AY313904

GAGCAGCTCTGCTACGTGCACTGCCACTTCTGCGACACCGTCTCTCGTGTGAGCGTGCCTACGAGCAGCCTG---  
---TTCAAGACGGTGACGGTACGATGCGGCCACTGCAGCAGCTTGCTCACCGTCAACAACAGACCTCCGGAG---  
AAGAGGCAGCGCTGCCGTGCGCGTACAACCGCTTCATCAAGGACGAAATCCAACGCATCAAGGCTGGCAATCCC  
GACATCTCGCACAGGGAGGCCTTTCAGCGCGGCGCCAAGAAGCTGGGCGCACTTTCCACACATCCACTTTGGACTC  
Zea\_mays\_AY313901

GAGCAGATCTGCTACGTGCACTGCAGCTACTGCGACACCATCTCTCGCGTGGGCGTGCCGTGCAGCAGCCTG---  
---TTCCAGACGGTACCCTGCGGTGCGGCCACTGCGCCAACCTGCTCTACGTCAACAACAAGACTTCAGAG---  
AAGCGGCAGAGAGTTCCTTCCGCATACAACCGTTTCATCAAAGATGAGATCCAGCGCATCAAGGCCAGCAATCCC  
GACATCACTCACAGGGAAGCTTTTCAGCGCGGCTGCCAAGAATTGGGCCATTTCCACACATCCATTTGGCCTC  
Zea\_mays\_AY313902

GAGCAGCTCTGCTACGTGCACTGCAACTGCTGCGACACCATCTCTCGCCGTGCGCGTGCCTTGCAGCAGCCTG---  
---TTCAAGACGGTGACGGTGCCTTGTGGCCACTGCGCCAACCTACTCTCCGTCAACAACAGGCCTCCGGAG---  
AAGCGGCAGAGAGTCCCCTGCGCATACAACCGTTTCATCAAGGACGAGATCCAGCGCATCAAGGCCGGAACCCG  
GACATCAACCCACCGGAGGCGTTCAGCGCAGCCGCAAAGAATTGGGCCATTTCCACACATCCACTTCGGCCTC  
Zea\_mays\_AY313903

GAGCAGCTCTGCTACGTGCACTGCTACTTCTGCGACACCGTCTCTCGTGTGAGCGTGCCTACGAGCAGCTTG---  
---TTCAAGACGGTGACGGTACGATGCGGCCACTGCAGCAGCTTGCTCACCGTCGACAACAGACCTCCGGAG---  
AAGAGGCAGCGCTGCCGTGCGCCTACAACCGCTTCATCAAGGACGAAATCCAACGCATCAAGGCTGGCAATCCC  
AACATCTCGCACAGGGAGGCCTTTCAGCGCGGCGCCAAGAAGCTGGGCGCACTTTCCACATATCCACTTTGGACTC
